# Supplementary material for: Discovery of quantitative trait loci for resistance to parasitic nematode infection in sheep: I. Analysis of outcross pedigrees
Source: PubMed Central journal article supplement (PMC1574317; doi:10.1186/1471-2164-7-178), 2006-07-18

# Linkage Analysis in the Parasite Outcross Flock: Chromosome 4

Information Content: Chromosome 4

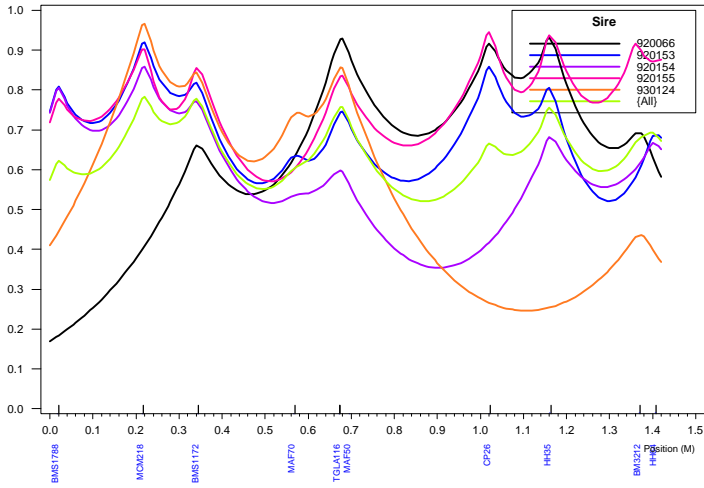

Haley-Knott QTL Analysis: Chromosome 4

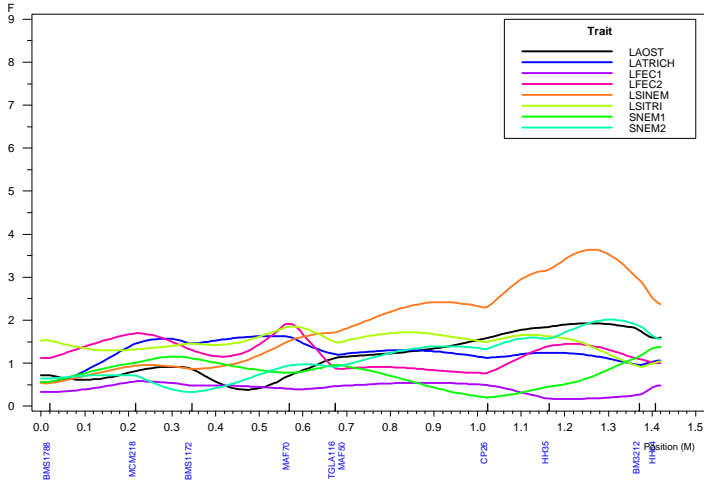

Haley-Knott QTL Analysis: Chromosome 4

Haley-Knott QTL Analysis: Chromosome 4

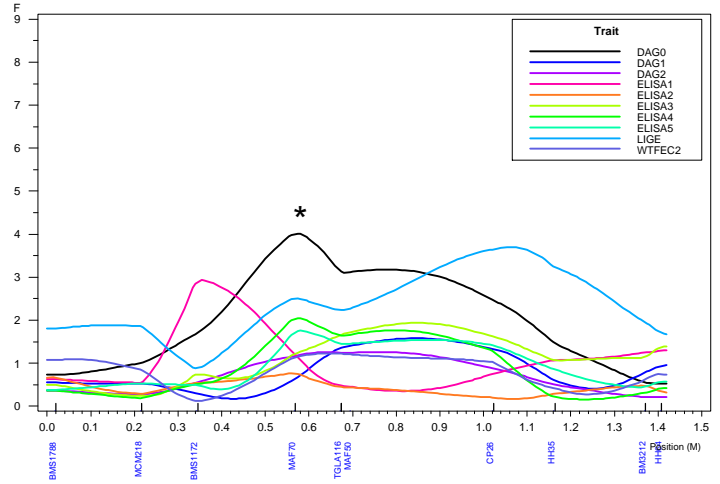

Haley-Knott QTL Analysis: Chromosome 4

Haley-Knott QTL Analysis: Chromosome 4

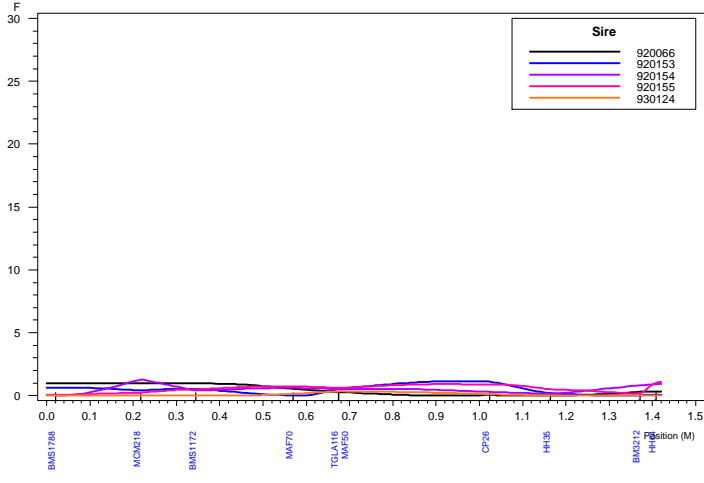

Haley-Knott QTL Analysis: Chromosome 4

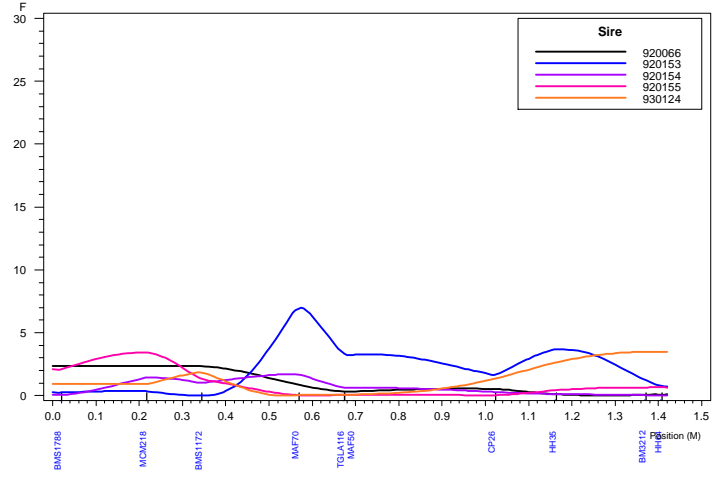

Haley-Knott QTL Analysis: Chromosome 4

Haley-Knott QTL Analysis: Chromosome 4

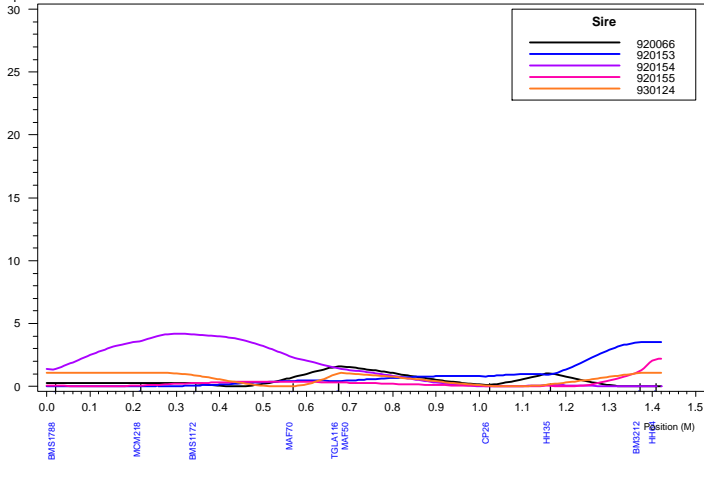

Haley-Knott QTL Analysis: Chromosome 4

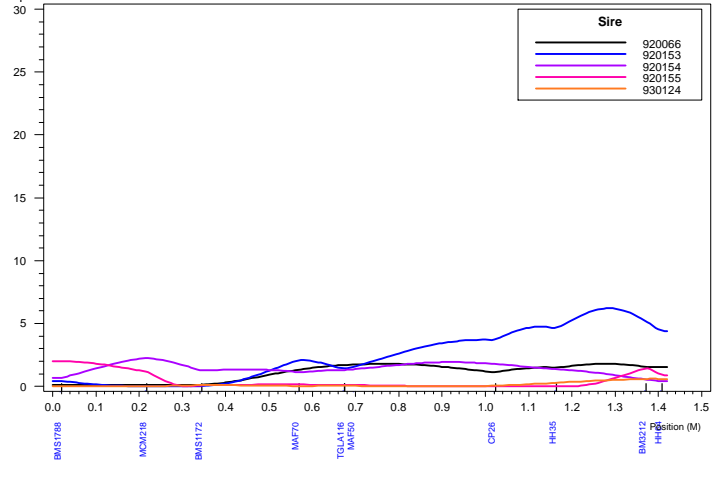

Haley-Knott QTL Analysis: Chromosome 4

Haley-Knott QTL Analysis: Chromosome 4  
LSINEM

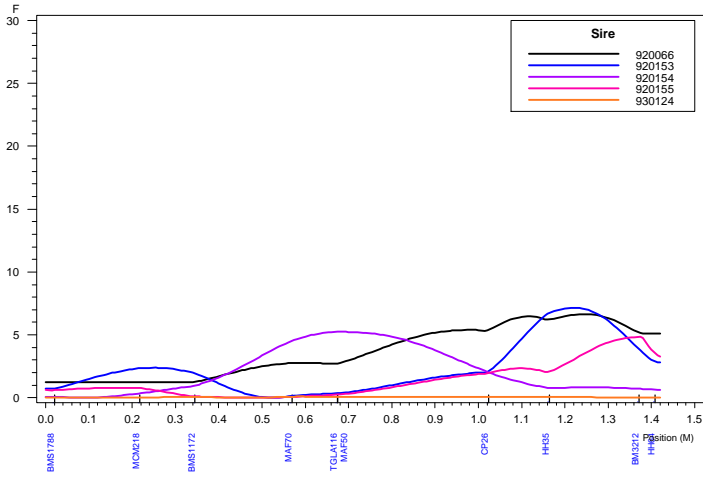

Haley-Knott QTL Analysis: Chromosome 4  
LSITRI

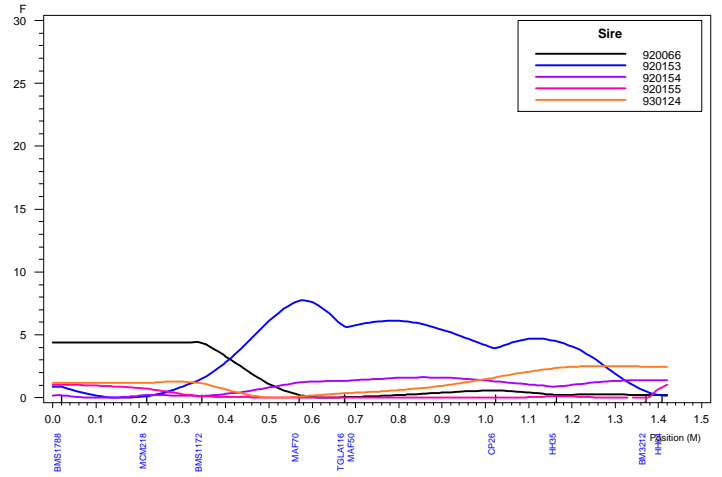

Haley-Knott QTL Analysis: Chromosome 4  
LAOST

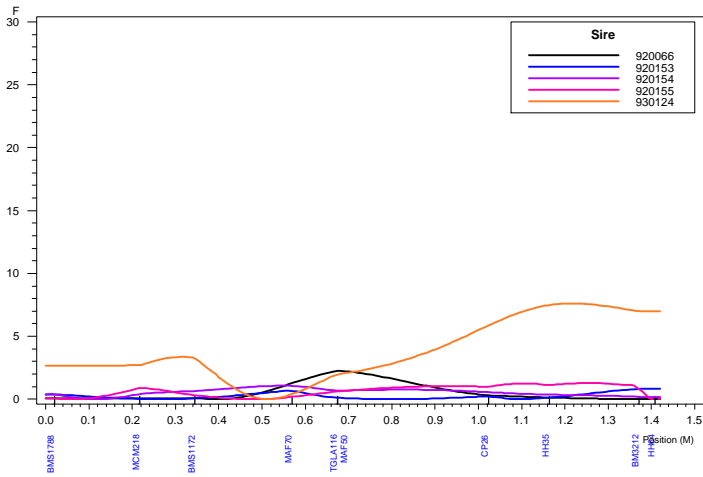

Haley-Knott QTL Analysis: Chromosome 4  
LATRICH

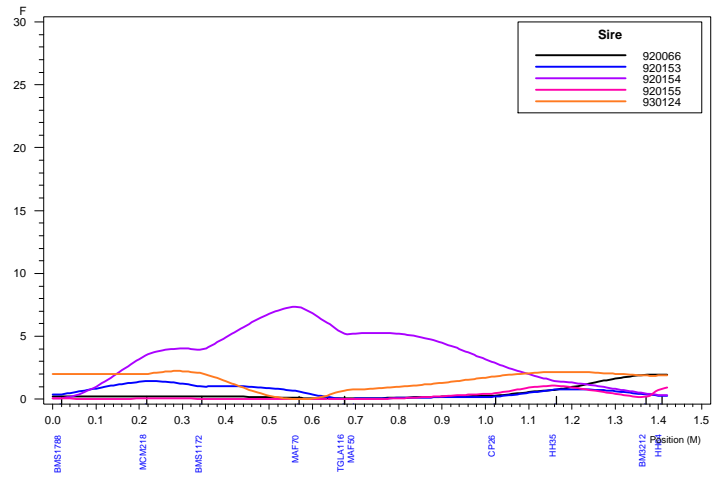

Haley-Knott QTL Analysis: Chromosome 4  
DAG0

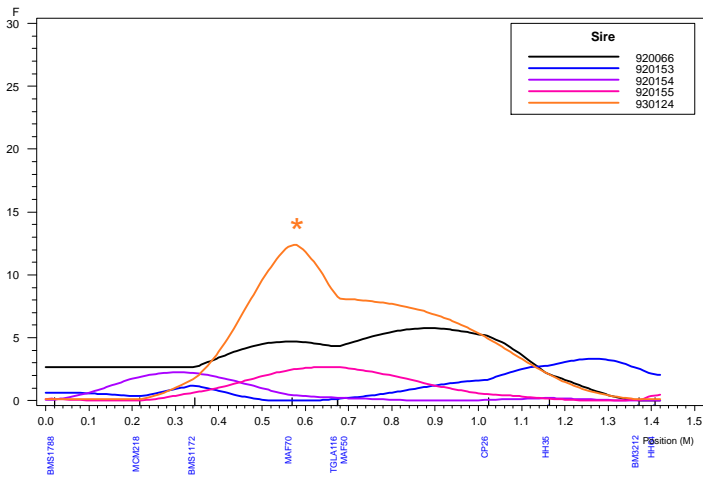

Haley-Knott QTL Analysis: Chromosome 4  
DAG1

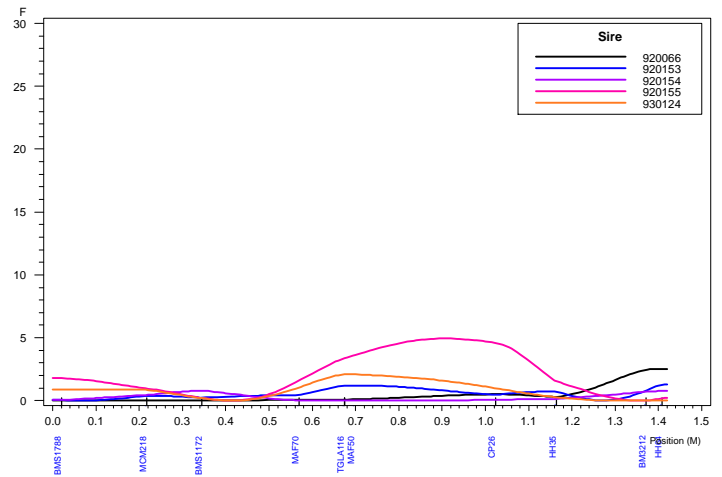

Haley-Knott QTL Analysis: Chromosome 4  
DAG2

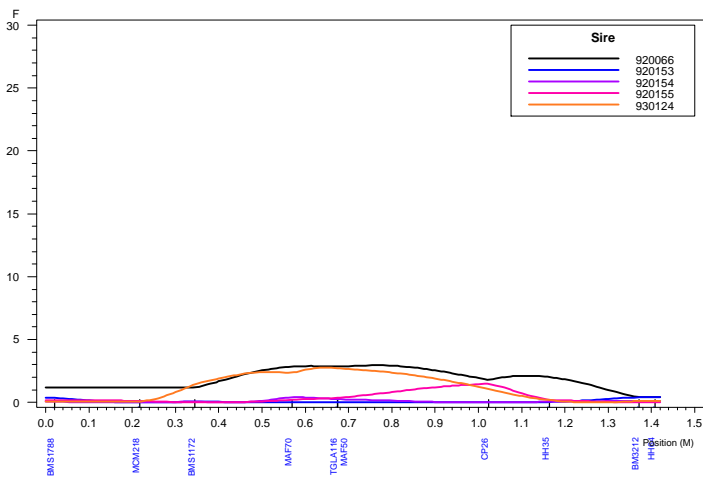

Haley-Knott QTL Analysis: Chromosome 4  
ELISA1

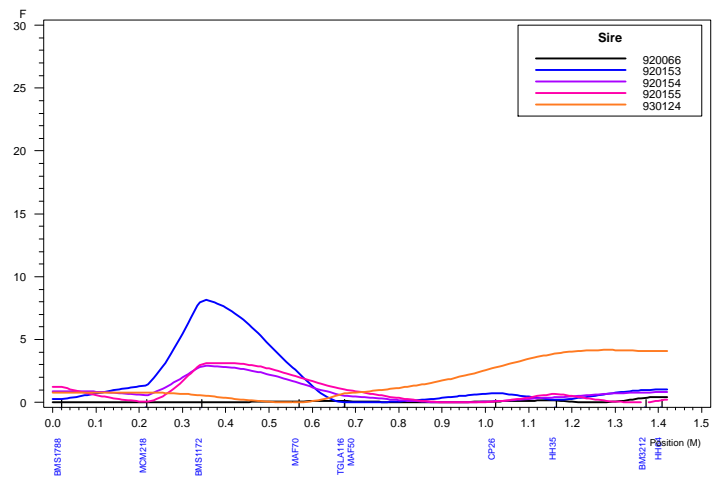

Haley-Knott QTL Analysis: Chromosome 4  
ELISA2

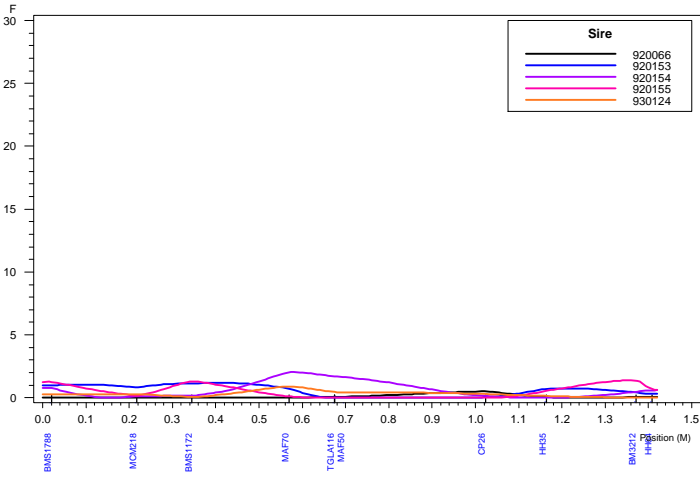

Haley-Knott QTL Analysis: Chromosome 4  
ELISA3

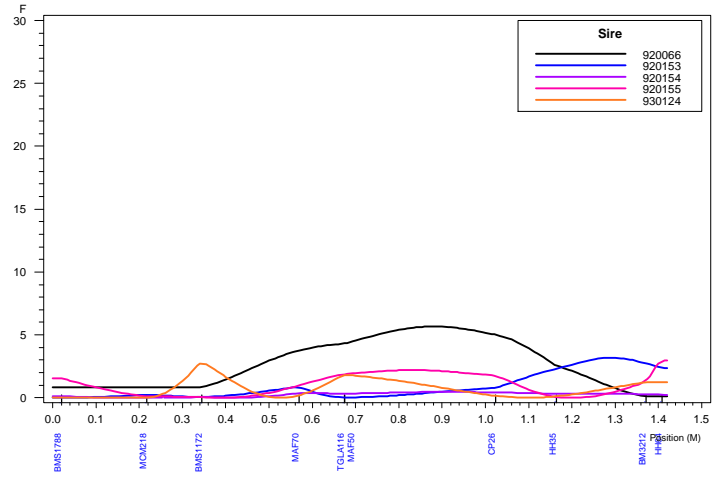

Haley-Knott QTL Analysis: Chromosome 4  
ELISA4

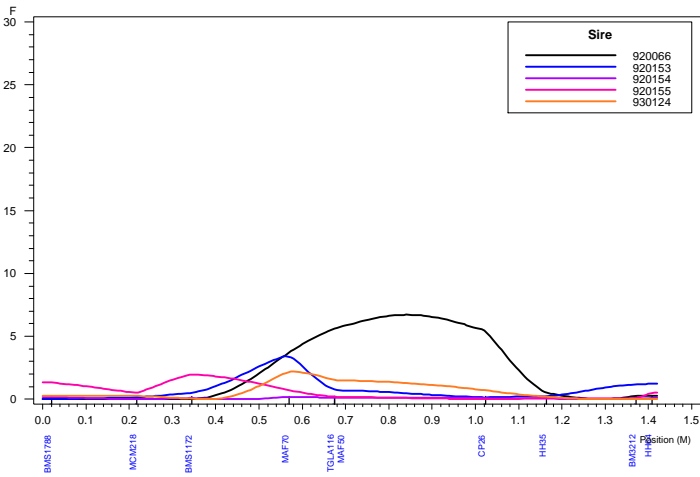

Haley-Knott QTL Analysis: Chromosome 4  
ELISA5

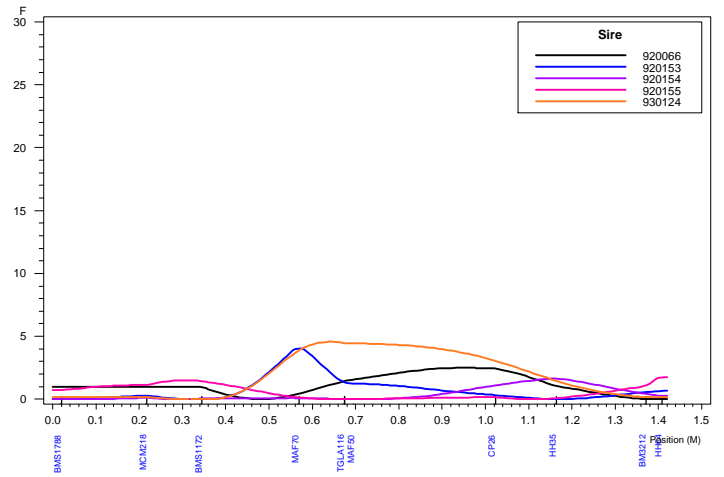

Haley-Knott QTL Analysis: Chromosome 4  
LIGE

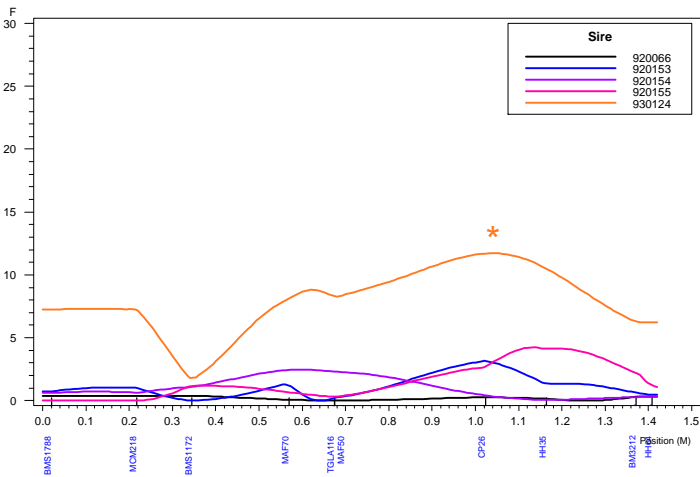

Haley-Knott QTL Analysis: Chromosome 4  
WTFEC2

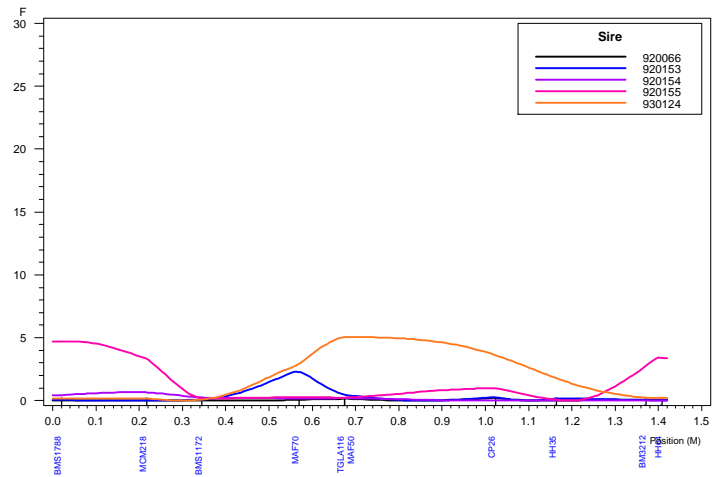

Supplement: 1471-2164-7-178-S9.pdf [file 1471-2164-7-178-S9.pdf]
