# Supplementary material for: Discovery of quantitative trait loci for resistance to parasitic nematode infection in sheep: I. Analysis of outcross pedigrees
Source: PubMed Central journal article supplement (PMC1574317; doi:10.1186/1471-2164-7-178), 2006-07-18

### Significance Thresholds for each trait across all families as determined by permutation

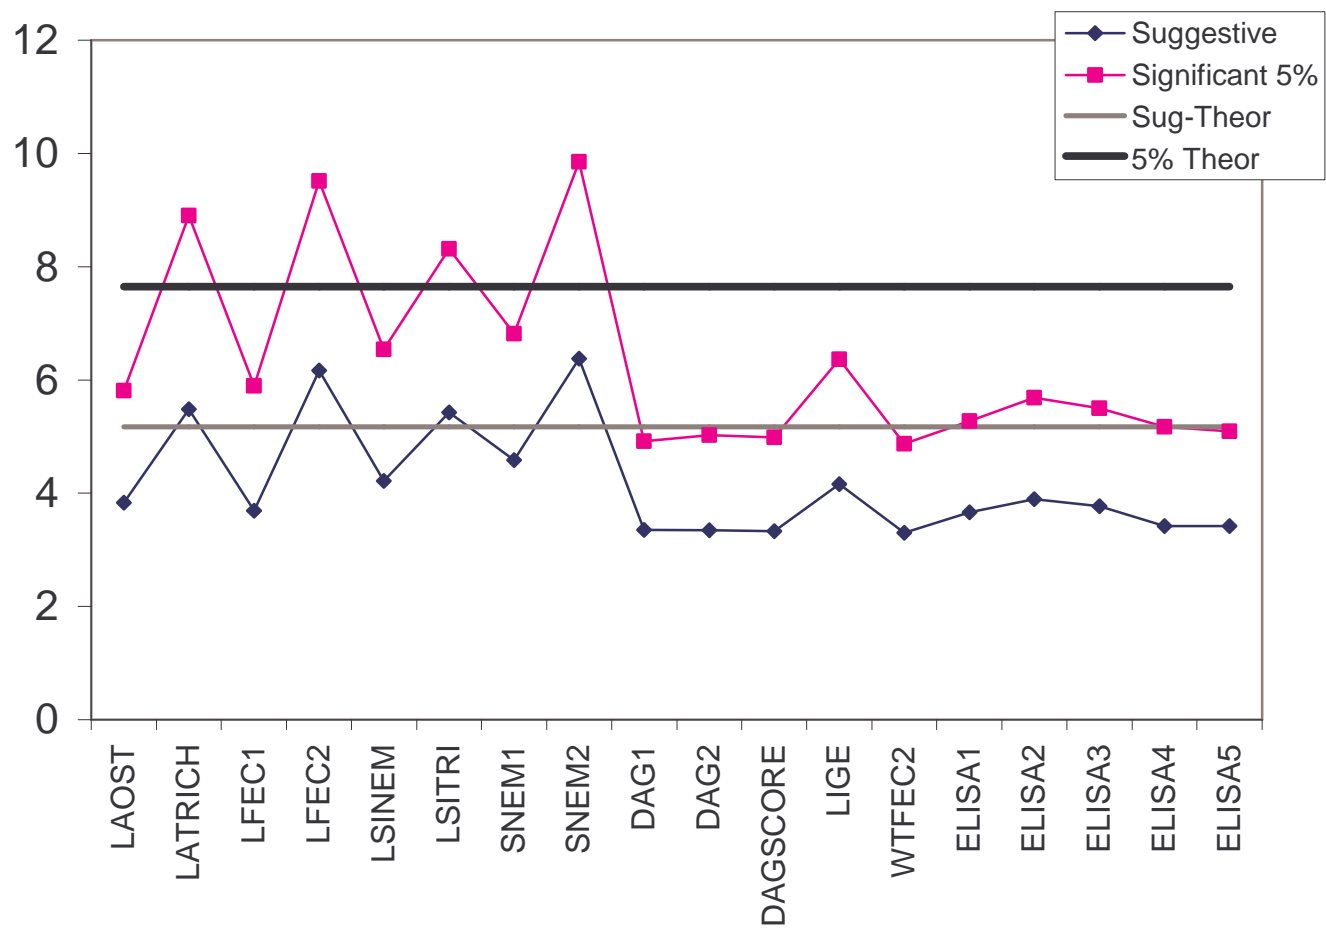

Supplement: 1471-2164-7-178-S1.pdf [file 1471-2164-7-178-S1.pdf]
